# Supplementary figures and images for: Agomelatine improves the cognitive function of rats with traumatic brain injury by regulating the polarization of microglia in the hippocampus
Source: Research Square preprint supplement (doi:10.21203/rs.3.rs-6822178/v1), 2025-06-20

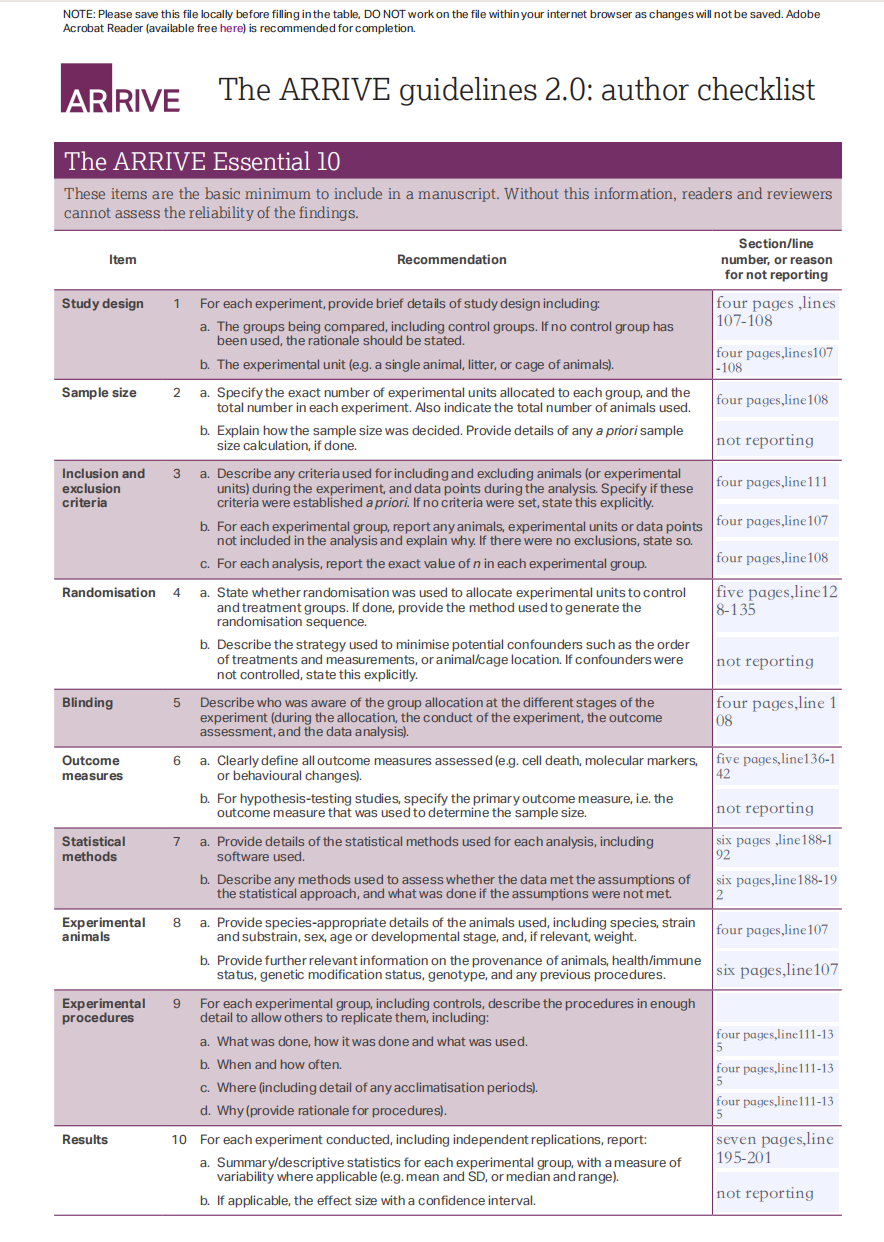


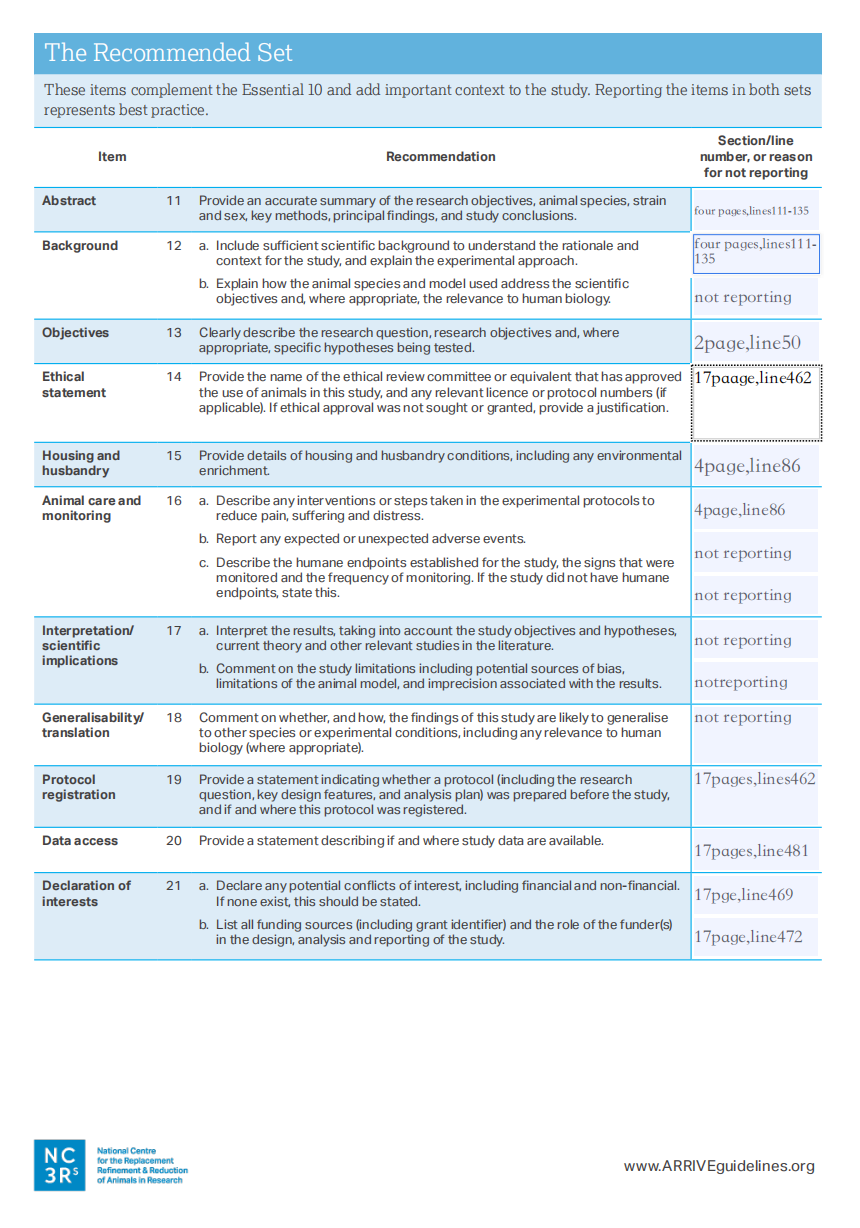

Supplement: Supplementary file 1 [file aef81ac356eb178a1642877c.docx]
